# Supplementary material for: Impact of animated instruction on tablets and hands-on training in applying bimanual perineal support on episiotomy rates: an intervention study
Source: Springer Nature journal article supplement (doi:10.1007/s00192-018-3711-6), 2018-07-14
Supplement: MOESM3 [file 16967810]

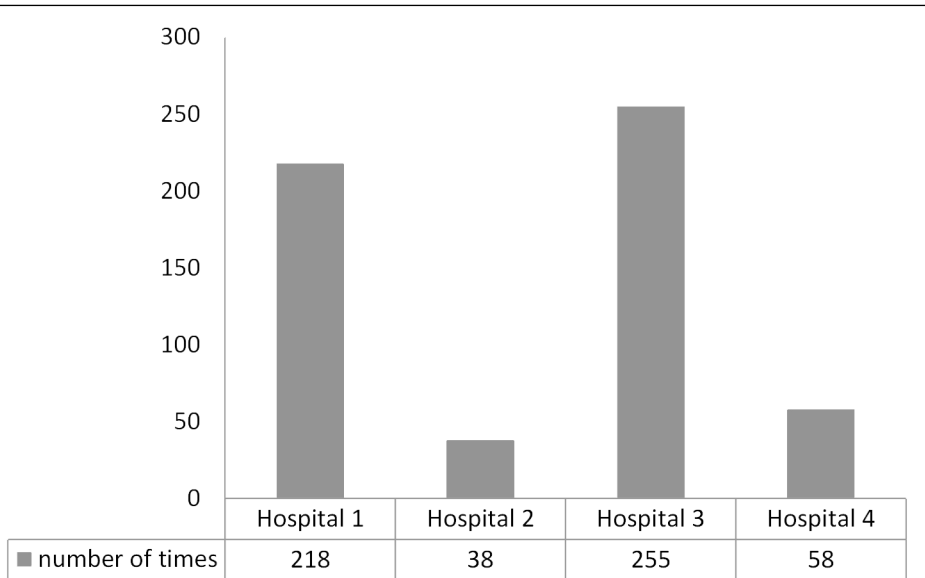

**Figure S1: Number of times animated instruction video watched per hospitals (from 15th of March to 27th of August 2016)**
